# Supplementary material for: Distinct antidepressant therapies act on a common brain network
Source: Research Square preprint supplement (doi:10.21203/rs.3.rs-6261102/v1), 2025-04-01
Supplement: Supplementary file 1 [file dd3b738a9d3b398c10065c77.docx]

**Supplementary Information for**

**Distinct antidepressant therapies act on a common brain network**

Contens

[**Distinct antidepressant therapies act on a common brain network** 1](#_Toc184150129)

[Supplementary Methods 1](#_Toc184150130)

[Supplementary S1: Inclusion criteria of specificity analysis 1](#_Toc184150131)

[Supplementary S2: Inclusion criteria of group-level validation 1](#_Toc184150132)

[Supplementary S3: Details of MDD connectome data 1](#_Toc184150133)

[Supplementary Tables 2](#_Toc184150134)

[Table S1: Search strategies for studies reporting gray matter volume increase after treatment in depression patients 2](#_Toc184150135)

[Table S2: Studies reporting gray matter volume increase in depression patients 3](#_Toc184150136)

[Table S3: Search strategies for studies reporting gray matter volume increase in non-depression patients 4](#_Toc184150137)

[Table S4: Studies reporting gray matter volume increase in non-depression patients 5](#_Toc184150138)

[Table S5: Results of specificity test 6](#_Toc184150139)

[Table S6: Search strategies for studies reporting cortical thickness increase after treatment in depression patients 7](#_Toc184150140)

[Table S7: Studies reporting cortical thickness increase in depression and non-depression patients 8](#_Toc184150141)

[Table S8: Result of gene annotation 9](#_Toc184150142)

[Table S9: Result of cognition annotation 12](#_Toc184150143)

[Table S10: Validation of transcranial magnetic stimulation (TMS) sites for depression 14](#_Toc184150144)

[Table S11: Validation of deep brain stimulation (DBS) sites for depression 14](#_Toc184150145)

[Table S12: Functional connectivity changes related to non-depressive symptoms 15](#_Toc184150146)

[Supplementary Figures 16](#_Toc184150147)

[Supplementary Figure 1: Work flow for identifying depression patients with gray matter increase from the literature. 16](#_Toc184150148)

[Supplementary Figure 2: Work flow for identifying non-depression patients with gray matter increase from the literature. 17](#_Toc184150149)

[Supplementary Figure 3: Work flow for identifying depression patients with cortical thickness increase from the literature. 18](#_Toc184150150)

[Supplementary Figure 4: The robust test of depression remission network 19](#_Toc184150151)

[Reference 20](#_Toc184150152)

# Supplementary Methods

## Supplementary S1: Inclusion criteria of specificity analysis

The included experiments of specificity analysis reporting gray matter volume changes after clinical treatment had to meet the following criteria: (1) patients not fulfilling DSM criteria for depressive disorder. (2) utilized whole-brain VBM analyses; (3) reported gray matter volume (GMV) longitudinally increases with treatment; (4) reported coordinates in Montreal Neurological Institute (MNI) or Talairach space; (5) performed whole-brain correction for multiple comparisons. The exclusion criteria were: (1) studies that did not report results in the form of standardized coordinates; (2) cross-sectional studies; (3) results that were not significant in longitudinal treatment; (4) The participants included in the study were healthy subjects. (5) studies that were a review or a meta-analysis.

## Supplementary S2: Inclusion criteria of group-level validation

The group-level validation included experiments reporting increased cortical thickness (CTh) in both depressed and non-depressed patients after clinical treatment. The inclusion criteria were as follows: (1) participants in the experimental group met the diagnostic criteria for depression, while those in the control group did not. (2) utilized whole-brain voxel-based CTh analyses. (3) reported CTh longitudinally increases with treatment; (4) reported coordinates in Montreal Neurological Institute (MNI) or Talairach space; (5) performed whole-brain correction for multiple comparisons. The exclusion criteria were: (1) studies that did not report results in the form of standardized coordinates; (2) cross-sectional studies; (3) results that were not significant in longitudinal treatment; (4) The participants included in the study were healthy subjects. (5) studies that were a review or a meta-analysis.

## Supplementary S3: Details of MDD connectome data

A total of 365 patients were included in MDD connectome data (251 females; mean age ± standard deviation, 28.41 ± 12.39 years; mean HAMD score ± standard deviation, 21.52±6.23), all participants provided written informed consent before the experiments. High-resolution structural images of brain anatomy and resting-state functional MRI (rs-fMRI) data were acquired for all individuals. The scanning parameters and processing of this data are consistent with those used for healthy connectome data.

# Supplementary Tables

| Database | **PubMed** |
| --- | --- |
| Date of search | 2022.3.24 |
| Search strategy | **Search term:** (“depressive disorder” OR depression) AND (“voxel-based morphometry” OR VBM OR “gray matter” OR “gray matter volume” OR “gray matter concentration”) AND (therapy OR therapeutic*)  **Publication data:** up to 2022.3.24  **Species:** Humans  **Language:** English |
| Items found | 296 |

## Table S1: Search strategies for studies reporting gray matter volume increase after treatment in depression patients

## Table S2: Studies reporting gray matter volume increase in depression patients

| Reference | MDD | | |  | Controls | | *P*(corrected) |
| --- | --- | --- | --- | --- | --- | --- | --- |
| Sample(M/F) | Age  (years) | Therapeutic modality |  | Sample(M/F) | Age  (years) |
| Arnone1 | 39(12/27) | 36.3±8.8 | Drug |  | 66(20/46) | 32.1±9.3 | *P*<0.05 |
| Fang2 | 20(12/8) | 59.2±3.7 | Drug |  | 18(10/8) | 59.1±7.5 | *P*<0.05 |
| Lai3 | 15(6/9) | 37.46±5.93 | Drug |  | 27(12/15) | 38.29±11.80 | *P*<0.05 |
| Krause4 | 13(6/7) | 71±NA | Drug |  | 14(6/8) | 72±NA | *P*<0.05 |
| Bouckaer5 | 28(8/20) | 71.9±7.8 | ECT |  | NA | NA | *P*<0.05 |
| Ota6 | 15(9/6) | 52.1±14.4 | ECT |  | NA | NA | *P*<0.05 |
| Redlich7 | 23(9/14) | 45.7±9.8 | ECT |  | 44(18/26) | 42.7±11.0 | *P*<0.05 |
| Sartorius8 | 18(9/9) | 51.7±14.0 | ECT |  | 36(18/18) | 51.6±13.7 | *P*<0.05 |
| Wang9 | 23(11/12) | 38.74±11.02 | ECT |  | 25(12/13) | 39.52±8.07 | *P*<0.05 |
| Sartorius10 | 92(50/42) | 50.4±12.41 | ECT |  | 43(22/21) | 49.53±11.74 | *P*<0.05 |
| Takamiya11 | 52(20/32) | 70.2±6.7 | ECT |  | NA | NA | *P*<0.05 |
| Takamiya11 | 56(21/35) | 71.7±7.7 | ECT |  | NA | NA | *P*<0.05 |
| Takamiya12 | 27(8/19) | 67.5±8.1 | ECT |  | 21(8/13) | 63±7.2 | *P*<0.05 |
| Cano13 | 12(6/6) | 59.17±8.02 | ECT |  | 10(5/5) | 54.4±8.37 | *P*<0.05 |
| Camiller14 | 85(46/39) | 50.31±12.32 | ECT |  | NA | NA | *P*<0.001 |
| Ge15 | 15(4/11) | 31.9±10.9 | MST |  | 10(3/7) | 33.8±7.3 | *P*<0.001 |

Data are presented as mean (standard deviations). The corrected *p* value indicates a significant increase in gray matter volume after treatment. ECT=Electroconvulsive therapy; MDD=Major depressive disorder; MST=Magnetic seizure therapy. NA indicates that the data is not available.

| Database | PubMed |
| --- | --- |
| Date of search | 2023.2.3 |
| Search strategy | **Search term:** (((therapy [Title/Abstract] OR therapeutic*[Title/Abstract] OR treatment [Title/Abstract]) AND (voxel-based morphometry [Title/Abstract] OR VBM[Title/Abstract] OR gray matter [Title/Abstract] OR gray matter volume [Title/Abstract] OR gray matter concentration [Title/Abstract])) AND (longitudinal [Title/Abstract])) NOT (depressive disorder [Title/Abstract] OR depression [Title/Abstract])  **Publication data:** up to 2023.2  **Species:** Humans  **Language:** English |
| Items found | 278 |

## Table S3: Search strategies for studies reporting gray matter volume increase in non-depression patients

## Table S4: Studies reporting gray matter volume increase in non-depression patients

| Reference | Diagnose | Disease | | | Controls | | *P*(corrected) |
| --- | --- | --- | --- | --- | --- | --- | --- |
| Sample(M/F) | Age  (years) | Therapeutic  modality | Sample(M/F) | Age  (years) |
| Yue16 | SCZ | 20(10/10) | 24.45±5.51 | Drug | 24(13/11) | 24.79±6.11 | *P*<0.05 |
| Wang17 | SCZ | 21(10/11) | 29.2±7.1 | ECT | 21(9/12) | 30.7±6.9 | *P*<0.05 |
| Shan18 | SCZ | 27(14/13) | 30.07±8.26 | ECT | 40(24/16) | 25.70±6.82 | *P*<0.05 |
| Mane19 | SCZ | 15(12/3) | 25.56±5.77 | Drug | 11(8/3) | 30.31±4.36 | *P*<0.05 |
| Boukezzi20 | PTSD | 11(7/4) | 34.9±10.0 | EMDR | 7(4/3) | 34.5±8.1 | *P*<0.05 |
| Parvaz21 | CUD | 19(13/6) | 42.58±7.63 | Abstinence | 12(11/1) | 39.33±8.66 | *P*<0.05 |
| Talati22 | SAD | 14(6/8) | 30.9±NA | Drug | 7(4/3) | 33.2±NA | *P*<0.05 |
| Köbe 23 | MCI | 13(9/4) | 70±7.2 | CIA | 9(5/4) | 70±5.2 | *P*<0.005 |
| Douaud24 | AD | 80(33/47) | 77±5 | Drug | 76(27/49) | 76±4 | *P*<0.05 |
| Martin25 | AN | 26(0/26) | 16.5±0.25 | WR | 20(0/20) | 17.25±0.33 | *P*<0.05 |
| MacKenzie26 | MS | 62(0/62) | 37.4±7.9 | Drug | 49(0/49) | 37.2±7.1 | *P*<0.05 |
| Delnooz27 | CD# | 23(9/14) | 57.3±9.8 | Drug | 22(10/12) | 54.5±NA | *P*<0.05 |
| Burciu28 | CD | 19(13/6) | 56.3±12 | PT | 19(11/8) | 53.5±12.9 | *P*<0.05 |
| Draganova29 | CD | 40(19/21) | 55±11.4 | MT | 40(20/20) | 55.9±10.9 | *P*<0.05 |
| Zhu30 | Epilepsy | 15(12/3) | 19.07±12.47 | VNS | NA | NA | *P*<0.05 |
| Rullmann31 | Obesity | 27(6/21) | 51.1±9.6 | Surgery | 14(5/9) | 52±6.1 | *P*<0.05 |
| Prehn32 | Obesity | 13(2/11) | 41±11 | Surgery | 14(6/8) | 47±12 | *P*<0.05 |
| Liu33 | Obesity | 22(10/12) | 27.14±1.76 | Surgery | 21(14/7) | 29.9±2.09 | *P*<0.05 |
| Wang34 | Obesity | 30(12/18) | 27.63±1.5 | Surgery | NA | NA | *P*<0.05 |
| Chen35 | Diabetes | 11(3/8) | 61.2±NA | Drug | 11(3/8) | 56.2±NA | *P*<0.05 |
| Wei36 | Tinnitus | 27(12/15) | 46.4±12.0 | ST | 27(12/15) | 46.6±9.9 | *P*<0.05 |
| Zhou37 | BC | 45(0/45) | 50.47±9.08 | NC | NA | NA | *P*<0.05 |
| Seminowicz38 | CP | 13(3/10) | 51.4±11.8 | CBT | 13(3/10) | 51.6±11.9 | *P*<0.05 |

Data are presented as mean (standard deviations). The corrected *p* value indicates a significant increase in gray matter volume after treatment. AD=Alzheimer’s disease; AN=Anorexia nervosa; BC=Breast cancer; CBT=Cognitive-behavioral therapy. CD#=Cervical dystonia; CD=Cerebellar degeneration; CP=Chronic pain; CIA=Combined interventional approaches; CUD=Cocaine use disorder; ECT=Electroconvulsive therapy; EMDR=Eye Movement Desensitization and Reprocessing; MCI=Mild cognitive impairment; MS=Multiple sclerosis; MT=Motor training; NC=Neoadjuvant chemotherapy; PT=Postural Training; PTSD=Posttraumatic stress disorder; SAD=Social anxiety disorder; SCZ=Schizophrenia; ST=Sound therapy; VNS=Vagus nerve stimulation; WR=Weight recovery; NA indicates that the data is not available.

| Cluster Size (voxels) | Brain Regions | Peak MNI coordinates | | | *t*-value |
| --- | --- | --- | --- | --- | --- |
| x | y | z |
| Disorder-controlled | | | | | |
| 312 | R. Superior temporal gyrus | 60 | 6 | -12 | 4.64 |
|  | R. Amygdala | 36 | 3 | -24 | 4.50 |
|  | R. ParaHippocampal | 24 | 6 | -27 | 4.40 |
| 326 | L. Superior temporal gyrus | -54 | 0 | -12 | 4.45 |
|  | L. Amygdala | -36 | 0 | -15 | 4.44 |
|  |  | -33 | -6 | -9 | 4.36 |
| Random-controlled | | | | | |
| 3183 | R. ParaHippocampal | -27 | -3 | -21 | 7.71 |
|  |  | -36 | -3 | -21 | 7.61 |
|  |  | 36 | -3 | -21 | 7.49 |

## Table S5: Brain regions identified in the specificity analysis

R=right hemisphere, L=left hemisphere, MNI=Montreal Neurological Institute

## Table S6: Search strategies for studies reporting cortical thickness changes after antidepressant treatment

| Database | PubMed |
| --- | --- |
| Date of search | 2023.3.10 |
| Search strategy | **Search term:** (cortical thickness [Title/Abstract] OR Surface-Based Morphometry [Title/Abstract] OR SBM[Title/Abstract]) AND (therapy [Title/Abstract] OR therapeutic*[Title/Abstract] OR treatment [Title/Abstract])  **Publication data:** up to 2023.3  **Species:** Humans  **Language:** English |
| Items found | 1054 |

| Reference | Diagnose | Disease | | | Controls | | P(corrected) |
| --- | --- | --- | --- | --- | --- | --- | --- |
| Sample(M/F) | Age  (years) | Therapeutic modality | Sample(M/F) | Age  (years) |
| Sartorius10 | MDD | 18(9/9) | 51.7±14.0 | ECT | 36(18/18) | 51.6±13.7 | *P*<0.05 |
| Van39 | MDD | 23(8/15) | 50.7±8.5 | ECT | 22(8/14) | 50.8±8.8 | *P*<0.005 |
| Krause40 | MDD | 17(7/10) | 73.24±4.6 | Drug | 12(8/4) | 69.08±6.6 | *P*<0.05 |
| Krause4 | MDD | 13(6/7) | 71±NA | Drug | 14(6/8) | 72±NA | *P*<0.05 |
| Ji41 | MDD | 96(25/71) | 40.2±12.1 | ECT | NA | NA | *P*<0.005 |
| Seminowicz42 | CLBP | 18(8/10) | 46±10.64 | Surgery | 16(8/8) | 40±13.16 | *P*<0.05 |
| Pawelczyk43 | SCZ | 18(12/6) | 23.06±4.9 | Drug | 11(7/4) | 22.0±3.77 | *P*<0.05 |
| Pundik44 | CS | 20(15/5) | 54.8±11.7 | AR | NA | NA | *P*<0.05 |
| Roffman45 | SCZ | 20(17/3) | 46.3±9.2 | Drug | 15(11/4) | 44.7±12.9 | *P*<0.05 |
| Rosenblau46 | ASD | 25(19/6) | 34.5±9.2 | SCOTT | 23(13/10) | 30.2±9.2 | *P*<0.05 |
| Liu33 | Obesity | 22(10/12) | 27.14±1.76 | Surgery | 21(14/7) | 29.90±2.09 | *P*<0.05 |

## Table S7: Studies reporting increased cortical thickness in depression and non-depression patients

Data are presented as mean (standard deviations). The corrected p value indicates a significant increase in cortical thickness after treatment. AR=Arm rehabilitation; ASD=Autism spectrum disorder; CLBP=Chronic low back pain; CS=Chronic stroke; MDD=Major depressive disorder; ECT=Electroconvulsive therapy; SCOTT=Computer-based social-cognitive training. SCZ=Schizophrenia; NA indicates that the data is not available.

## Table S8: Gene networks showing similar spatial similarity with the depression remission network

| Gene names | R values | P (FDR corrected) |
| --- | --- | --- |
| DCC | -0.6994 | 0.001 |
| TMEM161B | -0.6144 | 0.001 |
| BTN3A2 | 0.4792 | 0.001 |
| ZSCAN9 | -0.6739 | 0.001 |
| ZNF165 | -0.6864 | 0.001 |
| ZCCHC7 | -0.6442 | 0.001 |
| ASTN2 | -0.7284 | 0.001 |
| CACNA1E | 0.603 | 0.001 |
| HLA-B | 0.6566 | 0.001 |
| CHD6 | -0.8204 | 0.001 |
| KDM3A | -0.7167 | 0.001 |
| C16orf45 | -0.6859 | 0.001 |
| TRMT61A | -0.6392 | 0.001 |
| PRSS16 | -0.8118 | 0.001 |
| DCDC1 | 0.4702 | 0.001 |
| ZDHHC21 | -0.8733 | 0.001 |
| CABP1 | -0.6418 | 0.001 |
| CKB | -0.762 | 0.001 |
| ZDHHC5 | -0.7278 | 0.001 |
| FAM120A | 0.6598 | 0.001 |
| SORBS3 | -0.6137 | 0.001 |
| PCDHA1 | -0.6551 | 0.001 |
| SCYL1 | -0.8181 | 0.001 |
| CELF2 | -0.4847 | 0.001 |
| ELAVL2 | -0.7195 | 0.001 |
| RPS6KL1 | -0.5692 | 0.001 |
| ABT1 | -0.5061 | 0.001 |
| SCAI | -0.679 | 0.001 |
| MED19 | -0.4622 | 0.001 |
| CDH22 | -0.6056 | 0.001 |
| SLC30A9 | 0.5466 | 0.001 |
| TMEM67 | -0.612 | 0.001 |
| PLA2R1 | -0.5359 | 0.001 |
| PCDHA5 | -0.6847 | 0.001 |
| ACVR1B | -0.7159 | 0.001 |
| SPRY2 | -0.5968 | 0.001 |
| BAG5 | -0.6255 | 0.001 |
| PPP6C | -0.6519 | 0.001 |
| RABEPK | -0.7015 | 0.001 |
| CAMKK2 | -0.7239 | 0.001 |
| MANEA | 0.502 | 0.001 |
| ARHGEF25 | -0.6566 | 0.001 |
| VPS41 | -0.8009 | 0.001 |
| MIER1 | -0.6271 | 0.001 |
| BTN2A1 | -0.5516 | 0.002 |
| ANKK1 | 0.4837 | 0.002 |
| PSORS1C2 | 0.4576 | 0.002 |
| KIAA1143 | 0.4435 | 0.002 |
| NICN1 | -0.5396 | 0.002 |
| ATP1A3 | -0.4434 | 0.002 |
| TCF4 | -0.5598 | 0.003 |
| TRAF3 | -0.5706 | 0.003 |
| KIF15 | -0.5256 | 0.003 |
| EPHB2 | -0.5227 | 0.003 |
| HIST1H4L | -0.5186 | 0.005 |
| EXT1 | -0.455 | 0.006 |
| PHF2 | 0.3951 | 0.007 |
| TRMT10C | -0.5135 | 0.008 |
| SEMA6D | -0.4555 | 0.009 |
| RHOBTB1 | -0.4447 | 0.009 |
| ZNF638 | 0.4394 | 0.010 |
| HMGN4 | -0.4746 | 0.011 |
| PCDH9 | 0.4365 | 0.011 |
| CNTN5 | -0.4529 | 0.011 |
| TAL1 | 0.4172 | 0.011 |
| PSEN2 | -0.3962 | 0.014 |
| IK | -0.4586 | 0.014 |
| LTBP3 | 0.4184 | 0.015 |
| SERPING1 | -0.5361 | 0.015 |
| LIN28B | -0.38 | 0.016 |
| MYRF | 0.4253 | 0.018 |
| RFTN2 | 0.3681 | 0.019 |
| FCF1 | -0.4561 | 0.025 |
| HSPA1A | 0.2996 | 0.025 |
| PTPRS | 0.2348 | 0.026 |
| CTTNBP2 | 0.3698 | 0.026 |
| KYNU | 0.4624 | 0.031 |
| MICB | 0.3741 | 0.031 |
| ZNF184 | -0.3811 | 0.031 |
| BAZ2B | 0.3345 | 0.032 |
| EP300 | -0.4462 | 0.032 |
| ACTL8 | 0.348 | 0.032 |
| AP3B1 | 0.3147 | 0.034 |
| RTN1 | -0.3833 | 0.040 |
| GRM8 | -0.4111 | 0.040 |
| MEF2C | -0.4074 | 0.041 |
| METTL9 | -0.4248 | 0.043 |
| MARK3 | 0.3489 | 0.045 |
| POGZ | -0.4922 | 0.045 |
| DENND1B | -0.386 | 0.047 |

## Table S9: Cognitive networks showing similar spatical correlation with depression remission network.

| Cognitive terms | R values | *P* (FDR corrected) |
| --- | --- | --- |
| induction | 0.7166 | 0.001 |
| pain | 0.6997 | 0.001 |
| listening | 0.6753 | 0.001 |
| speech production | 0.6655 | 0.001 |
| speech perception | 0.6605 | 0.001 |
| rhythm | 0.638 | 0.001 |
| integration | 0.627 | 0.001 |
| morphology | 0.5961 | 0.001 |
| anticipation | 0.5561 | 0.001 |
| movement | 0.534 | 0.001 |
| motor control | 0.5271 | 0.001 |
| coordination | 0.5236 | 0.001 |
| gaze | -0.5013 | 0.001 |
| episodic memory | -0.5222 | 0.001 |
| knowledge | -0.5278 | 0.001 |
| thought | -0.5307 | 0.001 |
| familiarity | -0.5493 | 0.001 |
| rule | -0.5739 | 0.001 |
| retrieval | -0.5751 | 0.001 |
| strategy | -0.5959 | 0.001 |
| intention | -0.6004 | 0.001 |
| recognition | -0.614 | 0.001 |
| reasoning | -0.6355 | 0.001 |
| updating | -0.6373 | 0.001 |
| goal | -0.6404 | 0.001 |
| encoding | -0.6423 | 0.001 |
| memory | -0.6516 | 0.001 |
| judgment | -0.6589 | 0.001 |
| intelligence | -0.661 | 0.001 |
| search | -0.7019 | 0.001 |
| efficiency | -0.7363 | 0.001 |
| memory retrieval | -0.5294 | 0.001 |
| retention | -0.5515 | 0.001 |
| multisensory | 0.5462 | 0.002 |
| inference | -0.4106 | 0.002 |
| belief | -0.5026 | 0.002 |
| decision | -0.58 | 0.002 |
| facial expression | 0.5414 | 0.002 |
| localization | 0.5333 | 0.002 |
| discrimination | 0.5031 | 0.002 |
| aotobiographical memory | -0.4473 | 0.002 |
| uncertainty | -0.5777 | 0.002 |
| sentence comprehension | -0.3983 | 0.003 |
| perception | 0.562 | 0.003 |
| recall | -0.4554 | 0.003 |
| psychosis | -0.4127 | 0.004 |
| social cognition | -0.4302 | 0.004 |
| cognitive | -0.5557 | 0.004 |
| balance | 0.5516 | 0.005 |
| semantic memory | -0.4006 | 0.005 |
| concept | -0.4383 | 0.005 |
| risk | -0.4577 | 0.006 |
| decision making | -0.5438 | 0.006 |
| impulsivity | -0.4953 | 0.006 |
| consciousness | -0.5115 | 0.007 |
| reinforcement learning | -0.4781 | 0.007 |
| imagery | 0.4348 | 0.016 |
| task difficulty | -0.3406 | 0.018 |
| priming | -0.5131 | 0.023 |
| categorization | 0.4261 | 0.023 |
| salience | -0.4038 | 0.029 |
| maintenance | -0.3333 | 0.037 |
| naming | 0.4128 | 0.040 |
| hyperactivity | -0.3893 | 0.042 |
| context | -0.3479 | 0.048 |

## Table S10: Effective transcranial magnetic stimulation (TMS) targets for depression

| TMS targets | |  | MNI coordinates | | |
| --- | --- | --- | --- | --- | --- |
| Author | Year |  | X | Y | Z |
| Fox et al47 | 2012 |  | -41 | 16 | 54 |
| Cash et al48 | 2019 |  | -43 | 46 | 32 |
| Cho et al49 | 2009 |  | -40 | 31 | 34 |
| Fitzgerald et al50 | 2009 |  | -46 | 45 | 38 |
| Herbsman et al51 | 2009 |  | -46 | 23 | 49 |
| Herwig et al52 | 2003 |  | -37 | 26 | 49 |
| Paillère et al53 | 2010 |  | -44 | 20 | 48 |
| Teneback et al54 | 1999 |  | -41 | 48 | 35 |
| Weigand et al55 | 2018 |  | -33 | 30 | 50 |
| Rusjan et al56 | 2010 |  | -50 | 30 | 36 |
| Herbsman et al51 | 2009 |  | -41 | 17 | 55 |
| Rajkowska et al57 | 1995 |  | -36 | 39 | 43 |
| Rajkowska et al57 | 1995 |  | -44 | 40 | 29 |

## Table S11: Effective deep brain stimulation (DBS) sites for depression

| DBS targets | |  | MNI coordinates | | |
| --- | --- | --- | --- | --- | --- |
| Author | Year |  | X | Y | Z |
| Bewernick et al58 | 2018 |  | -5 | -4 | 9 |
| Drevets et al59 | 2002 |  | 3 | 32 | -10 |
| Hamani et al60 | 2009 |  | 6 | 34 | -6 |
| Kito et al61 | 2008 |  | 17 | 17 | -16 |
| Kito et al62 | 2011 |  | 8 | 22 | -9 |
| Mayberg et al63 | 2000 |  | 4 | 2 | -5 |
| Mayberg et al64 | 2005 |  | -2 | 9 | -11 |
| Mayberg et al64 | 2005 |  | 10 | 21 | -4 |
| Nahas et al65 | 2007 |  | 0 | 9 | -19 |
| Sani et al66 | 2017 |  | -52 | 0 | -6 |
| Wu et al67 | 1999 |  | 7 | 18 | -4 |

| Non-depressive symptoms | R values | *P* |
| --- | --- | --- |
| HAMA | 0.31 | 0.14 |
| PHQ15 | 0.15 | 0.48 |
| ISI | 0.28 | 0.20 |
| RRS | 0.26 | 0.25 |
| TEPS | 0.22 | 0.34 |
| PVAQ | -0.16 | 0.49 |

## Table S12: Functional connectivity changes related to non-depressive symptoms

HAMA=Hamilton anxiety scale; PHQ-15=Patient health questionnaire-15; ISI=Insomnia severity index; PVAQ=Pain Vigilance and Awareness Questionnaire; RRS=Ruminative Response Scale; TEPS=Temporal experience of pleasure scale.

# Supplementary Figures

**Identification of studies via databases and registers**

Records removed *before screening*:

Duplicate records removed

(n =7)

Records identified from:

Databases (n = 296)

Reference (n = 9)

**Identification**

Records screened

(n = 298)

Records excluded**

(n =248)

Reports sought for retrieval

(n =50)

Reports not retrieved

(n =0)

**Screening**

Reports excluded(n=35):

1.No whole-brain voxel-based analysis(n=7)

2. No longitudinal study(n=4)

3.No sufficient report of results(N=15)

4. No Difference(n=4)

5. Coordinate out of the mask(n=1)

6.Uncorrected(n=3)

Reports assessed for eligibility

(n =50)

Studies included

(n =15)

**Included**

## Supplementary Figure 1: Work flow for identifying studies investigating gray matter changes in depression patients.

**Identification of studies via databases and registers**

Records removed *before screening*:

Duplicate records removed

(n =0)

Records identified from:

Databases (n = 278)

Reference (n = 13)

**Identification**

Records screened

(n = 291)

Records excluded**

(n =217)

Reports sought for retrieval

(n =74)

Reports not retrieved

(n =0)

**Screening**

Reports excluded(n=51):

1.No whole-brain voxel-based analysis: n=12

2. No longitudinal study: n=3

3.Wrong sample (healthy subjects): n=1

4.No sufficient report of results: n=16

5. No Difference: n=2

6.Uncorrected: n=4

7.GMV decrease: n=10

8. No GMV: n=3

Reports assessed for eligibility

(n =74)

Studies included

(n =23)

**Included**

## Supplementary Figure2: Work flow for identifying studies investigating gray matter changes in non-depression patients.

**Identification of studies via databases and registers**

Records removed *before screening*:

Duplicate records removed

(n =0)

Records identified from:

Databases (n = 1054)

Reference (n = 1)

**Identification**

Records screened

(n = 1055)

Records excluded**

(n =971)

Reports sought for retrieval

(n =84)

Reports not retrieved

(n =0)

**Screening**

Reports excluded(n=73):

1.No whole-brain voxel-based analysis(n=9)

2. No longitudinal study(n=9)

3.No sufficient report of results(N=40)

4. No Difference(n=7)

5. Coordinate out of the mask(n=1)

6.Uncorrected(n=5)

7.Wrong sample(n=2)

Reports assessed for eligibility

(n =84)

Studies included

(n =11)

**Included**

## Supplementary Figure3: Work flow for identifying studies investigating cortical thickness changes in depression patients.


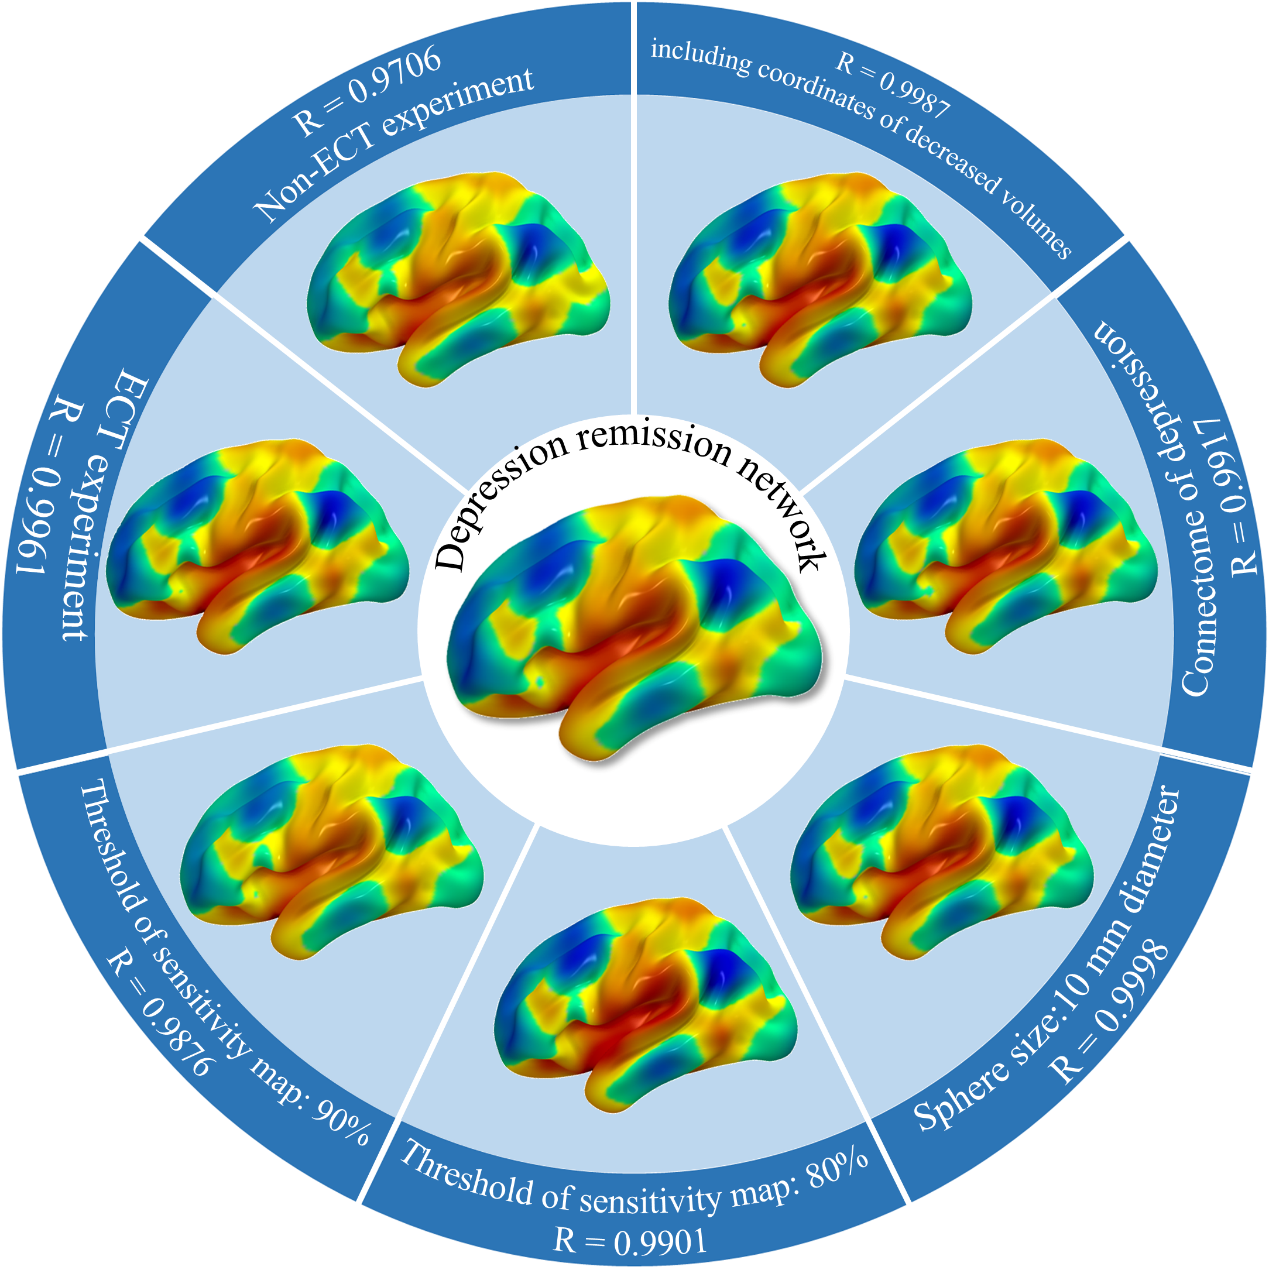


## Supplementary Figure4: The robust test of depression remission network

The robustness analysis indicated that the depression remission network exhibited strong stability and reliability, including when switching to connectome of 373 patients with depression (spatial correlation coefficient R = 0.9917), changing the sphere size (10 mm diameter, R = 0.9998), adjusting the threshold of sensitivity map (overlap ratio=80%, R = 0.9901; overlap ratio=90%, R = 0.9876), separately calculating the ECT experimental network (R = 0.9961) and the non-ECT experimental network (R = 0.9706), and including the coordinates with decreased volumes (R = 0.9987).

# Reference

1. Arnone, D.*, et al.* State-dependent changes in hippocampal grey matter in depression. *Mol Psychiatry* **18**, 1265-1272 (2013).

2. Fang, J.*, et al.* Functional and Anatomical Brain Abnormalities and Effects of Antidepressant in Major Depressive Disorder: Combined Application of Voxel-Based Morphometry and Amplitude of Frequency Fluctuation in Resting State. *J Comput Assist Tomogr* **39**, 766-773 (2015).

3. Lai, C.H., Wu, Y.T., Chen, C.Y. & Hou, Y.C. Gray matter increases in fronto-parietal regions of depression patients with aripiprazole monotherapy: An exploratory study. *Medicine (Baltimore)* **95**, e4654 (2016).

4. Krause-Sorio, B.*, et al.* Combined treatment with escitalopram and memantine increases gray matter volume and cortical thickness compared to escitalopram and placebo in a pilot study of geriatric depression. *J Affect Disord* **274**, 464-470 (2020).

5. Bouckaert, F.*, et al.* Grey matter volume increase following electroconvulsive therapy in patients with late life depression: a longitudinal MRI study. *J Psychiatry Neurosci* **41**, 105-114 (2016).

6. Ota, M.*, et al.* Effect of electroconvulsive therapy on gray matter volume in major depressive disorder. *J Affect Disord* **186**, 186-191 (2015).

7. Redlich, R.*, et al.* Prediction of Individual Response to Electroconvulsive Therapy via Machine Learning on Structural Magnetic Resonance Imaging Data. *JAMA Psychiatry* **73**, 557-564 (2016).

8. Sartorius, A.*, et al.* Electroconvulsive therapy increases temporal gray matter volume and cortical thickness. *Eur Neuropsychopharmacol* **26**, 506-517 (2016).

9. Wang, J.*, et al.* Electroconvulsive therapy selectively enhanced feedforward connectivity from fusiform face area to amygdala in major depressive disorder. *Soc Cogn Affect Neurosci* **12**, 1983-1992 (2017).

10. Sartorius, A.*, et al.* Electroconvulsive therapy induced gray matter increase is not necessarily correlated with clinical data in depressed patients. *Brain Stimul* **12**, 335-343 (2019).

11. Takamiya, A.*, et al.* Neural Substrates of Psychotic Depression: Findings From the Global ECT-MRI Research Collaboration. *Schizophr Bull* **48**, 514-523 (2022).

12. Takamiya, A.*, et al.* Association of electroconvulsive therapy-induced structural plasticity with clinical remission. *Prog Neuropsychopharmacol Biol Psychiatry* **110**, 110286 (2021).

13. Cano, M.*, et al.* Brain volumetric and metabolic correlates of electroconvulsive therapy for treatment-resistant depression: a longitudinal neuroimaging study. *Transl Psychiatry* **7**, e1023 (2017).

14. Camilleri, J.A.*, et al.* Electroconvulsive therapy modulates grey matter increase in a hub of an affect processing network. *Neuroimage Clin* **25**, 102114 (2020).

15. Ge, R.*, et al.* Magnetic seizure therapy is associated with functional and structural brain changes in MDD: Therapeutic versus side effect correlates. *J Affect Disord* **286**, 40-48 (2021).

16. Yue, Y.*, et al.* Regional Abnormality of Grey Matter in Schizophrenia: Effect from the Illness or Treatment? *PLoS One* **11**, e0147204 (2016).

17. Wang, J.*, et al.* ECT-induced brain plasticity correlates with positive symptom improvement in schizophrenia by voxel-based morphometry analysis of grey matter. *Brain Stimul* **12**, 319-328 (2019).

18. Shan, X.*, et al.* Increased subcortical region volume induced by electroconvulsive therapy in patients with schizophrenia. *Eur Arch Psychiatry Clin Neurosci* **271**, 1285-1295 (2021).

19. Mané, A.*, et al.* Progressive gray matter changes in first episode schizophrenia: a 4-year longitudinal magnetic resonance study using VBM. *Schizophrenia Research* **114**, 136-143 (2009).

20. Boukezzi, S.*, et al.* Grey matter density changes of structures involved in Posttraumatic Stress Disorder (PTSD) after recovery following Eye Movement Desensitization and Reprocessing (EMDR) therapy. *Psychiatry Res Neuroimaging* **266**, 146-152 (2017).

21. Parvaz, M.A.*, et al.* Prefrontal gray matter volume recovery in treatment-seeking cocaine-addicted individuals: a longitudinal study. *Addict Biol* **22**, 1391-1401 (2017).

22. Talati, A., Pantazatos, S.P., Hirsch, J. & Schneier, F. A pilot study of gray matter volume changes associated with paroxetine treatment and response in social anxiety disorder. *Psychiatry Res* **231**, 279-285 (2015).

23. Köbe, T.*, et al.* Combined omega-3 fatty acids, aerobic exercise and cognitive stimulation prevents decline in gray matter volume of the frontal, parietal and cingulate cortex in patients with mild cognitive impairment. *NeuroImage* **131**, 226-238 (2016).

24. Douaud, G.*, et al.* Preventing Alzheimer's disease-related gray matter atrophy by B-vitamin treatment. *Proceedings of the National Academy of Sciences of the United States of America* **110**, 9523-9528 (2013).

25. Martin Monzon, B.*, et al.* Grey matter volume in adolescents with anorexia nervosa and associated eating disorder symptoms. *Eur J Neurosci* **46**, 2297-2307 (2017).

26. MacKenzie-Graham, A.*, et al.* Estriol-mediated neuroprotection in multiple sclerosis localized by voxel-based morphometry. *Brain Behav* **8**, e01086 (2018).

27. Delnooz, C.C.S., Pasman, J.W. & van de Warrenburg, B.P.C. Dynamic cortical gray matter volume changes after botulinum toxin in cervical dystonia. *Neurobiology of Disease* **73**, 327-333 (2015).

28. Burciu, R.G.*, et al.* Brain changes associated with postural training in patients with cerebellar degeneration: a voxel-based morphometry study. *The Journal of Neuroscience : the Official Journal of the Society For Neuroscience* **33**, 4594-4604 (2013).

29. Draganova, R.*, et al.* Motor training-related brain reorganization in patients with cerebellar degeneration. *Human Brain Mapping* **43**, 1611-1629 (2022).

30. Zhu, J.*, et al.* Grey and white matter microstructure changes in epilepsy patients with vagus nerve stimulators. *Clin Neurol Neurosurg* **209**, 106918 (2021).

31. Rullmann, M.*, et al.* Gastric-bypass surgery induced widespread neural plasticity of the obese human brain. *Neuroimage* **172**, 853-863 (2018).

32. Prehn, K.*, et al.* Bariatric Surgery and Brain Health-A Longitudinal Observational Study Investigating the Effect of Surgery on Cognitive Function and Gray Matter Volume. *Nutrients* **12**(2020).

33. Liu, L.*, et al.* Structural changes in brain regions involved in executive-control and self-referential processing after sleeve gastrectomy in obese patients. *Brain Imaging and Behavior* **13**, 830-840 (2019).

34. Wang, Y.*, et al.* Laparoscopic sleeve gastrectomy induces sustained changes in gray and white matter brain volumes and resting functional connectivity in obese patients. *Surg Obes Relat Dis* **16**, 1-9 (2020).

35. Chen, Z., Li, J., Sun, J. & Ma, L. Brain expansion in patients with type II diabetes following insulin therapy: a preliminary study with longitudinal voxel-based morphometry. *J Neuroimaging* **24**, 484-491 (2014).

36. Wei, X.*, et al.* Neuroanatomical Alterations in Patients With Tinnitus Before and After Sound Therapy: A Voxel-Based Morphometry Study. *Frontiers In Neuroscience* **14**, 911 (2020).

37. Zhou, X.*, et al.* Early alterations in cortical morphology after neoadjuvant chemotherapy in breast cancer patients: A longitudinal magnetic resonance imaging study. *Human Brain Mapping* **43**, 4513-4528 (2022).

38. Seminowicz, D.A.*, et al.* Cognitive-behavioral therapy increases prefrontal cortex gray matter in patients with chronic pain. *The Journal of Pain* **14**, 1573-1584 (2013).

39. van Eijndhoven, P.*, et al.* Bilateral ECT induces bilateral increases in regional cortical thickness. *Transl Psychiatry* **6**, e874 (2016).

40. Krause-Sorio, B.*, et al.* Cortical thickness increases with levomilnacipran treatment in a pilot randomised double-blind placebo-controlled trial in late-life depression. *Psychogeriatrics* **20**, 140-148 (2020).

41. Ji, G.J.*, et al.* Neuroplasticity-Related Genes and Dopamine Receptors Associated with Regional Cortical Thickness Increase Following Electroconvulsive Therapy for Major Depressive Disorder. *Mol Neurobiol* **60**, 1465-1475 (2023).

42. Seminowicz, D.A.*, et al.* Effective treatment of chronic low back pain in humans reverses abnormal brain anatomy and function. *J Neurosci* **31**, 7540-7550 (2011).

43. Pawełczyk, T.*, et al.* Omega-3 fatty acid supplementation may prevent loss of gray matter thickness in the left parieto-occipital cortex in first episode schizophrenia: A secondary outcome analysis of the OFFER randomized controlled study. *Schizophr Res* **195**, 168-175 (2018).

44. Pundik, S., Scoco, A., Skelly, M., McCabe, J.P. & Daly, J.J. Greater Cortical Thickness Is Associated With Enhanced Sensory Function After Arm Rehabilitation in Chronic Stroke. *Neurorehabil Neural Repair* **32**, 590-601 (2018).

45. Roffman, J.L.*, et al.* Biochemical, physiological and clinical effects of l-methylfolate in schizophrenia: a randomized controlled trial. *Mol Psychiatry* **23**, 316-322 (2018).

46. Rosenblau, G., O'Connell, G., Heekeren, H.R. & Dziobek, I. Neurobiological mechanisms of social cognition treatment in high-functioning adults with autism spectrum disorder. *Psychol Med* **50**, 2374-2384 (2020).

47. Fox, M.D., Buckner, R.L., White, M.P., Greicius, M.D. & Pascual-Leone, A. Efficacy of transcranial magnetic stimulation targets for depression is related to intrinsic functional connectivity with the subgenual cingulate. *Biol Psychiatry* **72**, 595-603 (2012).

48. Cash, R.F.H.*, et al.* Subgenual Functional Connectivity Predicts Antidepressant Treatment Response to Transcranial Magnetic Stimulation: Independent Validation and Evaluation of Personalization. *Biol Psychiatry* **86**, e5-e7 (2019).

49. Cho, S.S. & Strafella, A.P. rTMS of the left dorsolateral prefrontal cortex modulates dopamine release in the ipsilateral anterior cingulate cortex and orbitofrontal cortex. *PLoS One* **4**, e6725 (2009).

50. Fitzgerald, P.B.*, et al.* A randomized trial of rTMS targeted with MRI based neuro-navigation in treatment-resistant depression. *Neuropsychopharmacology* **34**, 1255-1262 (2009).

51. Herbsman, T.*, et al.* More lateral and anterior prefrontal coil location is associated with better repetitive transcranial magnetic stimulation antidepressant response. *Biol Psychiatry* **66**, 509-515 (2009).

52. Herwig, U.*, et al.* Add-on rTMS for treatment of depression: a pilot study using stereotaxic coil-navigation according to PET data. *J Psychiatr Res* **37**, 267-275 (2003).

53. Paillère Martinot, M.-L.*, et al.* Influence of prefrontal target region on the efficacy of repetitive transcranial magnetic stimulation in patients with medication-resistant depression: a [(18)F]-fluorodeoxyglucose PET and MRI study. *Int J Neuropsychopharmacol* **13**, 45-59 (2010).

54. Teneback, C.C.*, et al.* Changes in prefrontal cortex and paralimbic activity in depression following two weeks of daily left prefrontal TMS. *J Neuropsychiatry Clin Neurosci* **11**, 426-435 (1999).

55. Weigand, A.*, et al.* Prospective Validation That Subgenual Connectivity Predicts Antidepressant Efficacy of Transcranial Magnetic Stimulation Sites. *Biol Psychiatry* **84**, 28-37 (2018).

56. Rusjan, P.M.*, et al.* Optimal transcranial magnetic stimulation coil placement for targeting the dorsolateral prefrontal cortex using novel magnetic resonance image-guided neuronavigation. *Hum Brain Mapp* **31**, 1643-1652 (2010).

57. Rajkowska, G. & Goldman-Rakic, P.S. Cytoarchitectonic definition of prefrontal areas in the normal human cortex: II. Variability in locations of areas 9 and 46 and relationship to the Talairach Coordinate System. *Cereb Cortex* **5**, 323-337 (1995).

58. Bewernick, B.H.*, et al.* Deep brain stimulation of the supero-lateral branch of the medial forebrain bundle does not lead to changes in personality in patients suffering from severe depression. *Psychol Med* **48**, 2684-2692 (2018).

59. Drevets, W.C., Bogers, W. & Raichle, M.E. Functional anatomical correlates of antidepressant drug treatment assessed using PET measures of regional glucose metabolism. *Eur Neuropsychopharmacol* **12**, 527-544 (2002).

60. Hamani, C.*, et al.* Deep brain stimulation of the subcallosal cingulate gyrus for depression: anatomical location of active contacts in clinical responders and a suggested guideline for targeting. *J Neurosurg* **111**, 1209-1215 (2009).

61. Kito, S., Fujita, K. & Koga, Y. Changes in regional cerebral blood flow after repetitive transcranial magnetic stimulation of the left dorsolateral prefrontal cortex in treatment-resistant depression. *J Neuropsychiatry Clin Neurosci* **20**, 74-80 (2008).

62. Kito, S., Hasegawa, T. & Koga, Y. Neuroanatomical correlates of therapeutic efficacy of low-frequency right prefrontal transcranial magnetic stimulation in treatment-resistant depression. *Psychiatry Clin Neurosci* **65**, 175-182 (2011).

63. Mayberg, H.S.*, et al.* Regional metabolic effects of fluoxetine in major depression: serial changes and relationship to clinical response. *Biol Psychiatry* **48**, 830-843 (2000).

64. Mayberg, H.S.*, et al.* Deep brain stimulation for treatment-resistant depression. *Neuron* **45**, 651-660 (2005).

65. Nahas, Z.*, et al.* Serial vagus nerve stimulation functional MRI in treatment-resistant depression. *Neuropsychopharmacology* **32**, 1649-1660 (2007).

66. Sani, S., Busnello, J., Kochanski, R., Cohen, Y. & Gibbons, R.D. High-frequency measurement of depressive severity in a patient treated for severe treatment-resistant depression with deep-brain stimulation. *Transl Psychiatry* **7**, e1207 (2017).

67. Wu, J.*, et al.* Prediction of antidepressant effects of sleep deprivation by metabolic rates in the ventral anterior cingulate and medial prefrontal cortex. *Am J Psychiatry* **156**, 1149-1158 (1999).
